# Supplementary material for: ELN2017 risk stratification improves outcome prediction when applied to the prospective GIMEMA AML1310 protocol
Source: PubMed Central journal article supplement — Blood Adv. 2022 Apr 18;6(8):2510–6. doi: 10.1182/bloodadvances.2021005717 (PMC9043923; doi:10.1182/bloodadvances.2021005717), 2022-04-18

## Supplemental materials

### *GIMEMA AML1310 inclusion/exclusion criteria*

Inclusion criteria: age 18 to 60.9 years; non-promyelocytic AML; WHO performance status  $\leq$  3; adequate liver (serum bilirubin level  $\leq$  2 UNL; AST and ALT  $\leq$  3 UNL), renal (serum creatinine  $\leq$  2 UNL) and cardiac (LVEF  $\geq$  50% by echocardiogram) functions; absence of severe neurological or psychiatric comorbidities and congestive heart failure or active uncontrolled infections; signed informed consent.

Exclusion criteria: blast crisis of chronic myeloid leukemia; therapy-related or secondary AML supervening after other chronic myeloproliferative diseases or antecedent myelodysplastic syndromes of more than six months duration; contemporary presence of any other progressive malignant disease

### *Treatment schedule*

Induction consisted of i.v. daunorubicin 50 mg/m<sup>2</sup> daily on days 1,3 and 5; i.v. etoposide 50 mg/m<sup>2</sup> daily on days 1 to 5; i.v. cytarabine 100 mg/m<sup>2</sup> as a daily continuous infusion, days 1 to 10. All patients in CR/CRi after a maximum of two induction cycles, received one consolidation course consisting of i.v. daunorubicin 50 mg/m<sup>2</sup> daily on days 4, 5 and 6 and i.v. cytarabine 500 mg/m<sup>2</sup> every 12 hours on days 1 to 6. In patients belonging to NCCN-FR and NCCN-IR categories, peripheral blood stem cell collection was attempted by initiating G-CSF on day 20 from the start of consolidation therapy, until completion of stem cell collection. BM was used as a source when failing to collect a sufficient number of PB stem cells. In the case of poor BM harvest, instead of AuSCT, patients were to receive a second consolidation course with high dose cytarabine (HDARAC).

Salvage therapy consisted of one/two courses of i.v. fludarabine 30 mg/m<sup>2</sup> daily, on days 1-5; cytarabine 2000 mg/m<sup>2</sup> daily, on days 1-5; idarubicin 8 mg/m<sup>2</sup> daily, on days 1-3.

For patients allocated to ASCT, the procedure had to be performed whatever the source of stem cells (HLA-identical sibling, HLA-identical unrelated donor, cord blood, HLA-haploidentical sibling). Whatever the original NCCN risk category, patients with resistant disease after up to 2 cycles of induction therapy were allocated to the ASCT procedure once CR/CRi was achieved.

**Supplemental Figure 1. Survival curves of the whole study population.** With a median follow-up of 28.8 months, 2-year-OS (A) and DFS (B) were 56% (median duration 38 months) and 54% (median duration 32.4 months), respectively.

**A**

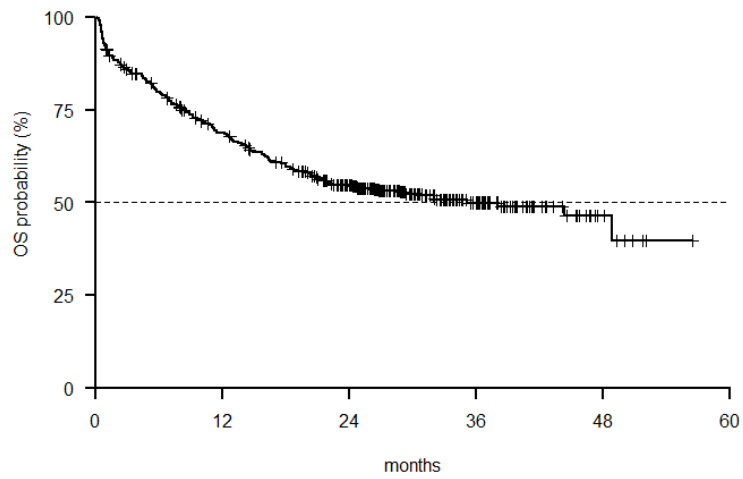

**B**

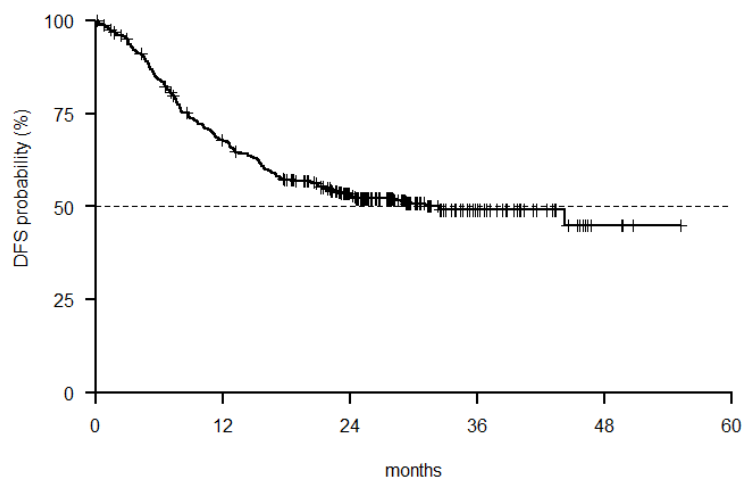

**Supplemental Figure 2. CIR stratified by ELN2017 classes.** Two-year CIR was 31.3%, 29.4%, 42.8%, and 39.2% for the ELN2017-FR, ELN2017-IR, ELN2017-AR and ELN2017-NC patients, respectively ( $p=0.2343$ ). [Figure 2S]

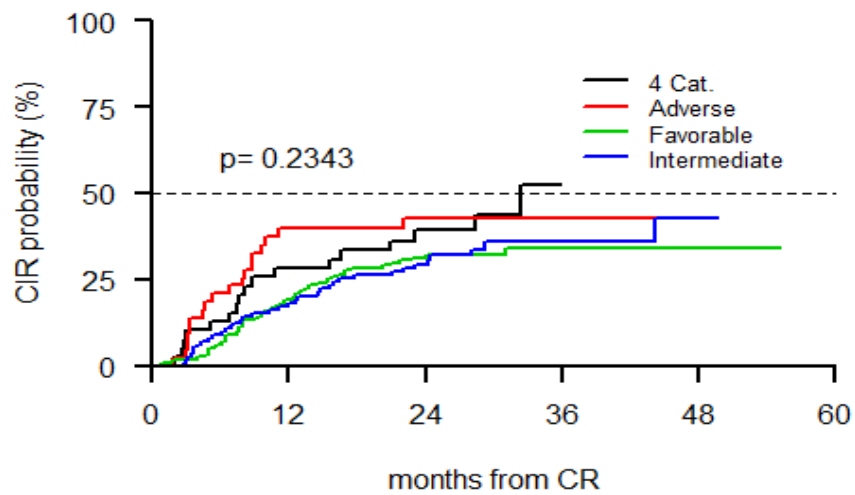

**Supplemental Figure 3. OS “from-transplant” in 85 ELN2017 patients according to the MRD status.** 2-years OS, was not different between AuSCT and ASCT in MRD negative (A) patients (85.7 vs. 77.8,  $p=0.234$ ) whereas, among MRD positive ones (B), was significantly longer for those receiving ASCT (75% vs 0,  $p=0.0231$ ).

**A**

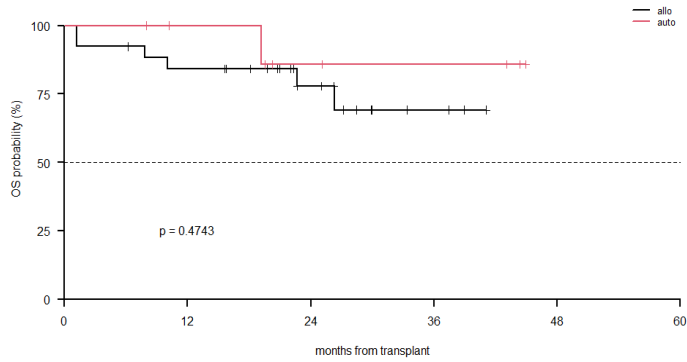

**B**

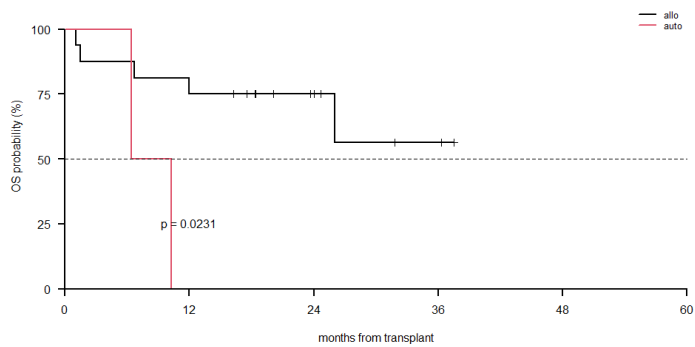

**Supplemental Figure 4. Stratified analysis of age impact in the overall series.** Patients aged 18-49 years showed an OS of 64.2% as compared to those aged 50-61 years ( $p < 0.001$ ).

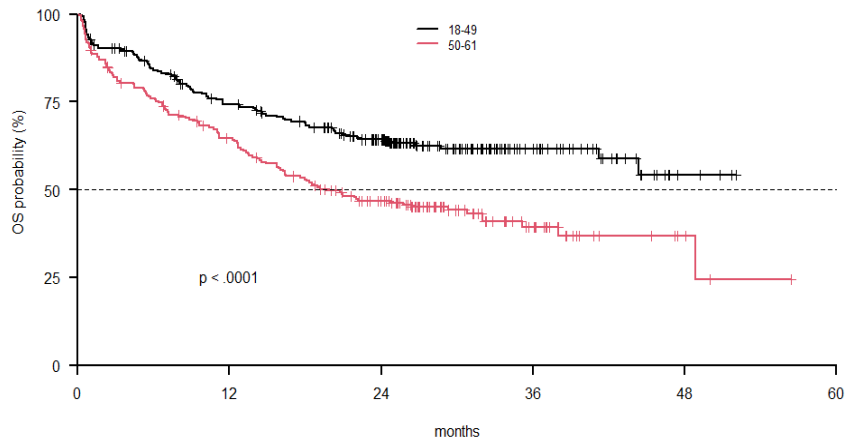

Supplement: advancesADV2021005717-suppl1.pdf [file advancesADV2021005717-suppl1.pdf]
